# Supplementary material for: Histamine H1 Receptor-Mediated JNK Phosphorylation Is Regulated by Gq Protein-Dependent but Arrestin-Independent Pathways
Source: MDPI journal article supplement (doi:10.3390/ijms25063395), 2024-03-17
Supplement: s1 [file s1]

(a) WT

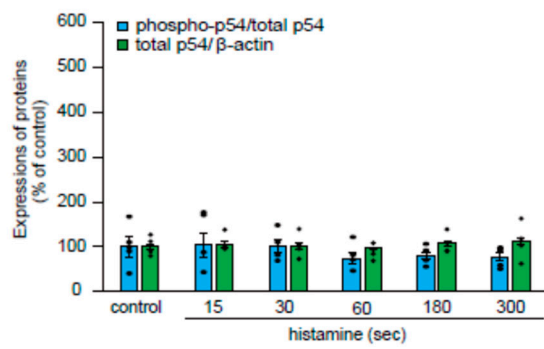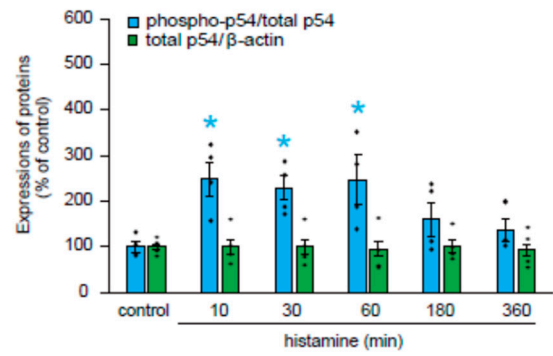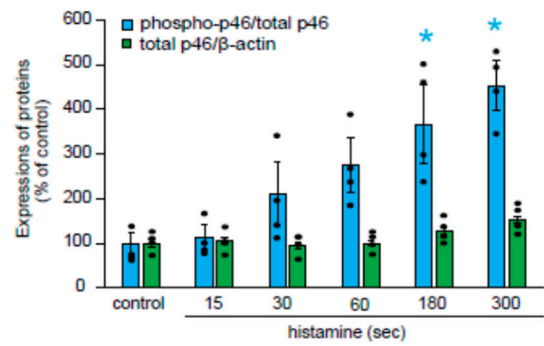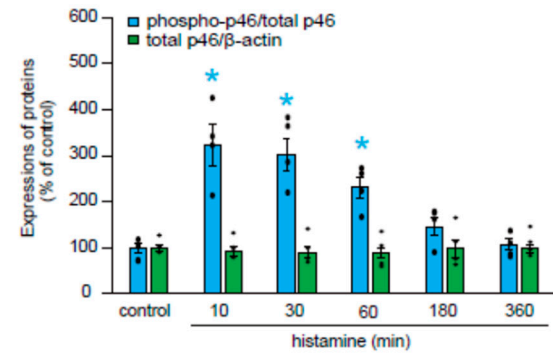

(b) S487TR

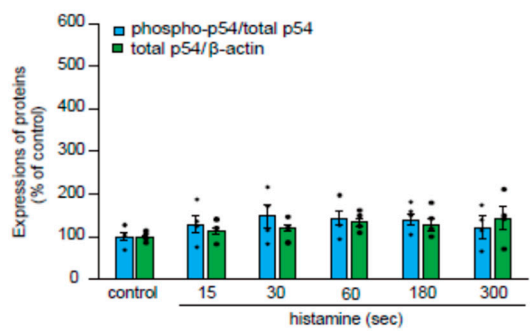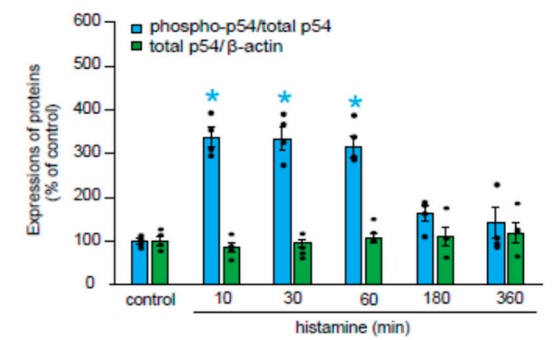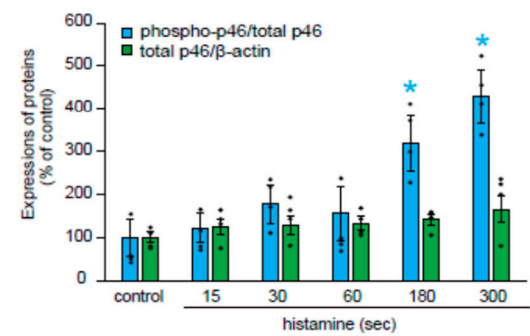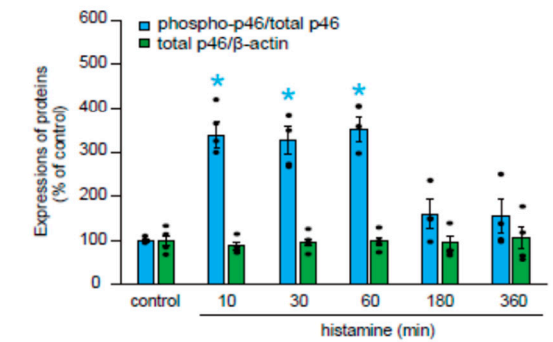

Supplemental Figure S2. Time courses of histamine-induced p46 and p54 phosphorylation. CHO cells expressing WT (a) and S487TR (b) were stimulated with or without (control) 100  $\mu$ M histamine for 15–300 sec (left) and 10–360 min (right), and then protein extracts from the cells were subjected to immunoblot analyses. Histamine-induced changes in the ratios of phosphorylated p54 to total p54 (phospho-p54/total p54) and total p54 to  $\beta$ -actin (total p54/ $\beta$ -actin) are shown as percentages of the control without histamine treatment in the upper graphs in (a) and (b). Histamine-induced changes in the ratios of phosphorylated p46 to total p46 (phospho-p46/total p46) and total p46 to  $\beta$ -actin (total p46/ $\beta$ -actin) are shown as percentages of the control without histamine treatment in the lower graphs in (a) and (b). Assays were repeated four times. Values represent mean  $\pm$  SE of data obtained from four independent protein samples. Individual data are shown as scatter plots. \* $P$  < 0.05 vs. control; one-way ANOVA and Dunnett's test.
