# Supplementary material for: Histamine H1 Receptor-Mediated JNK Phosphorylation Is Regulated by Gq Protein-Dependent but Arrestin-Independent Pathways
Source: MDPI journal article supplement (doi:10.3390/ijms25063395), 2024-03-17
Supplement: s1 [file s1]

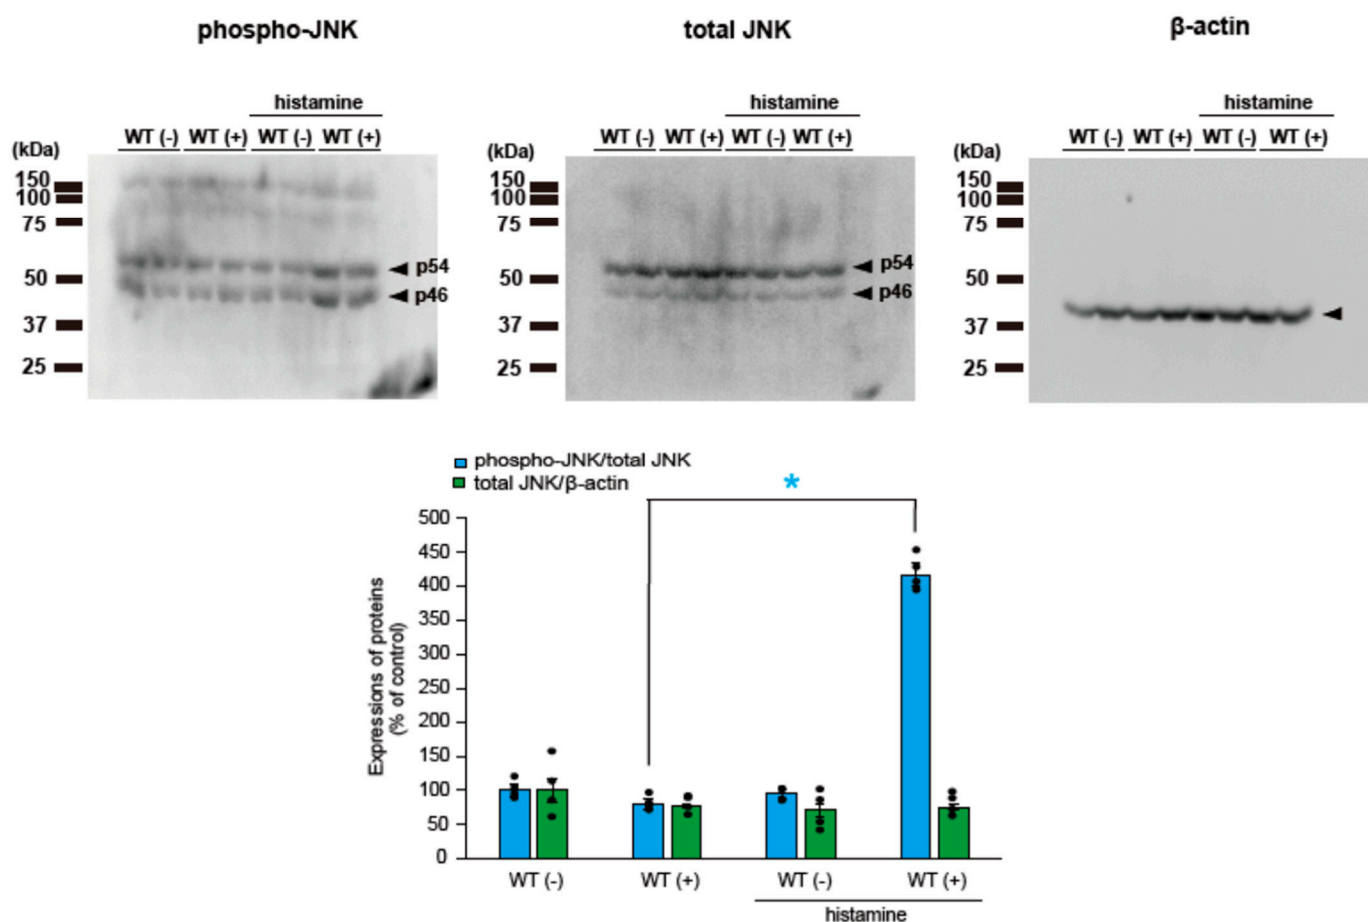

Supplemental Figure S1. Comparison of histamine-induced JNK phosphorylation in CHO cells non-expressing (WT (-)) and expressing WT H<sub>1</sub> receptors (WT (+)). WT (-) and WT (+) CHO cells were stimulated with or without 100  $\mu$ M histamine for 30 min and then protein extracts from the cells were subjected to immunoblot analyses. Typical untruncated immunoblot images of phosphorylated JNK (phospho-JNK, p46 and p54) (left), total JNK (p46 and p54) (middle), and  $\beta$ -actin (40 kDa) (right) are shown in the upper panels with arrowheads. The molecular weights are shown in the left side of images. Histamine-induced changes in the ratios of phosphorylated JNK to total JNK (phospho-JNK/total JNK) and total JNK to  $\beta$ -actin (total JNK/ $\beta$ -actin) are shown as percentages of the control in the lower graphs. Assays were repeated twice. Values represent mean  $\pm$  SE of data obtained from four independent protein samples. Individual data are shown as scatter plots. \* $P$  < 0.05 vs. WT (+) without histamine treatment; one-way ANOVA and Tukey's test.
