# Supplementary material for: Histamine H1 Receptor-Mediated JNK Phosphorylation Is Regulated by Gq Protein-Dependent but Arrestin-Independent Pathways
Source: MDPI journal article supplement (doi:10.3390/ijms25063395), 2024-03-17
Supplement: s1 [file s1]

(a) WT

Histamine 15-300 sec (n=4)

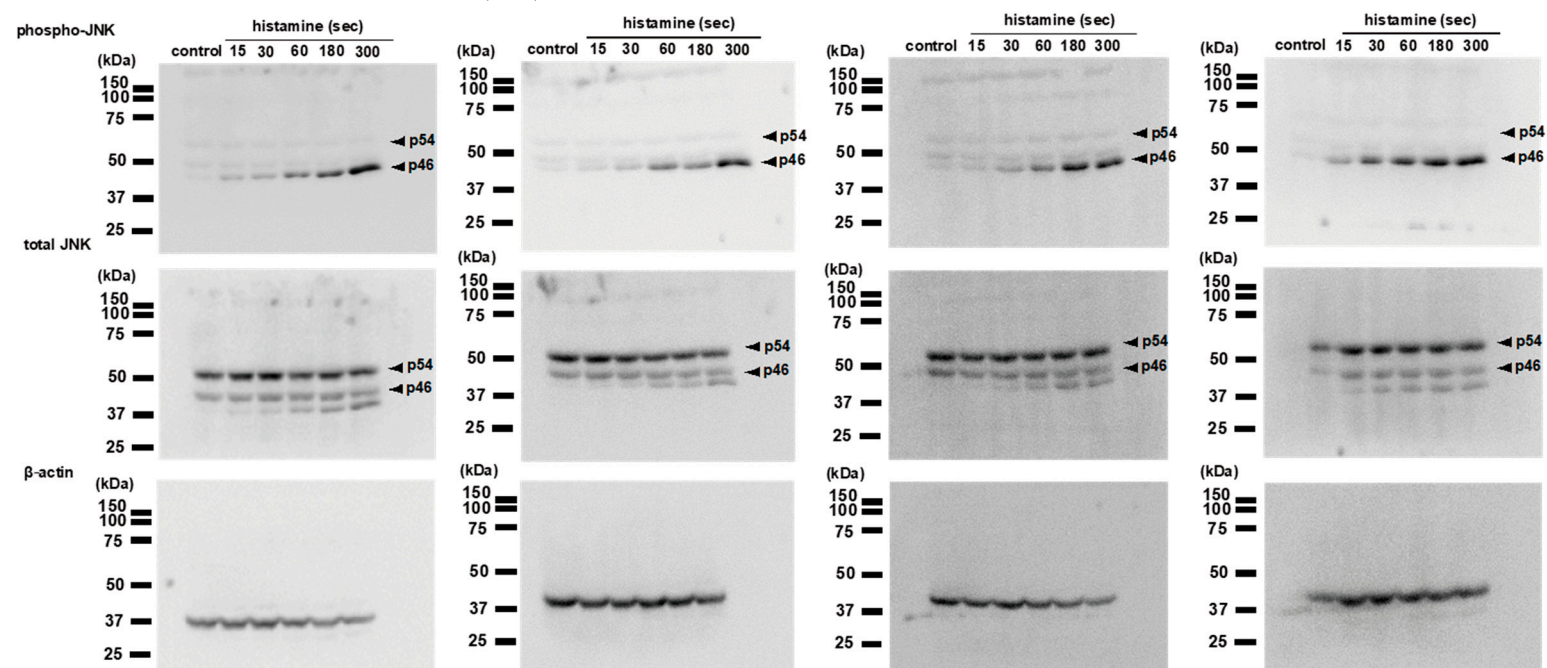

Histamine 10-360 min (n=4)

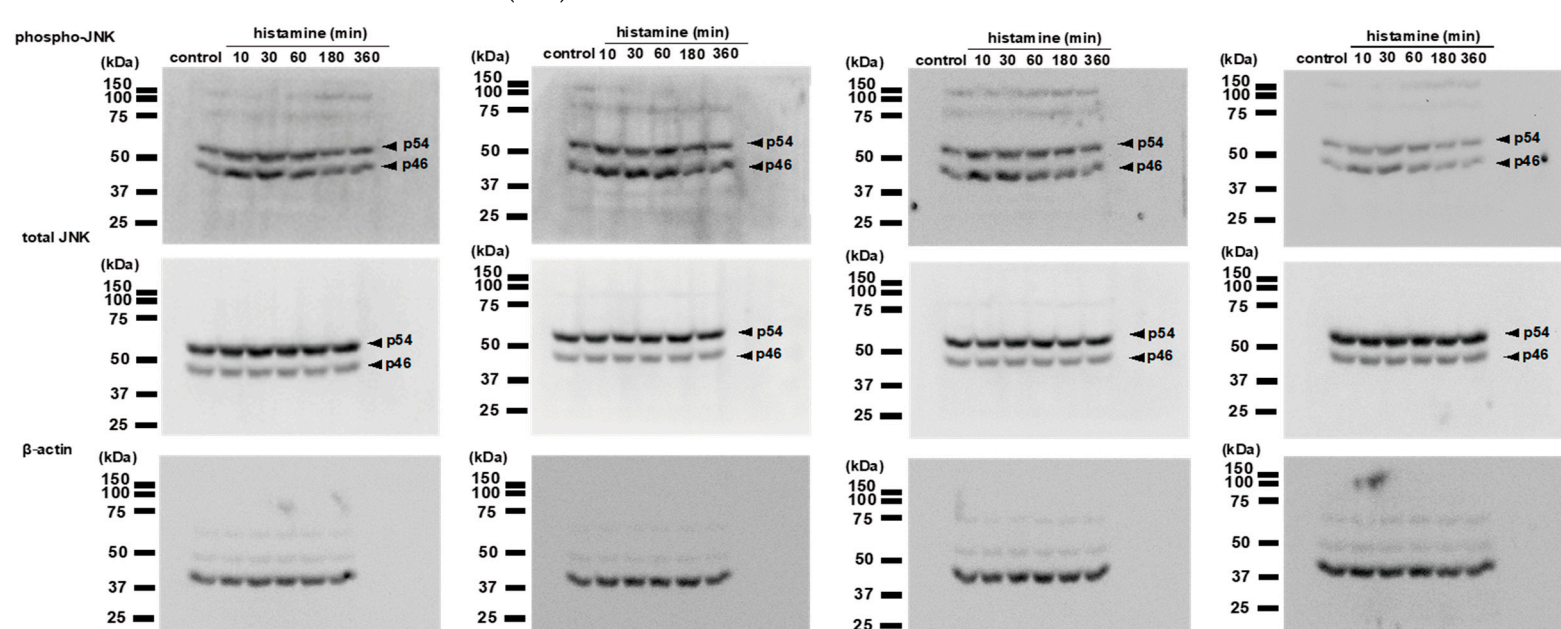

Histamine 12 and 24 h (n=4)

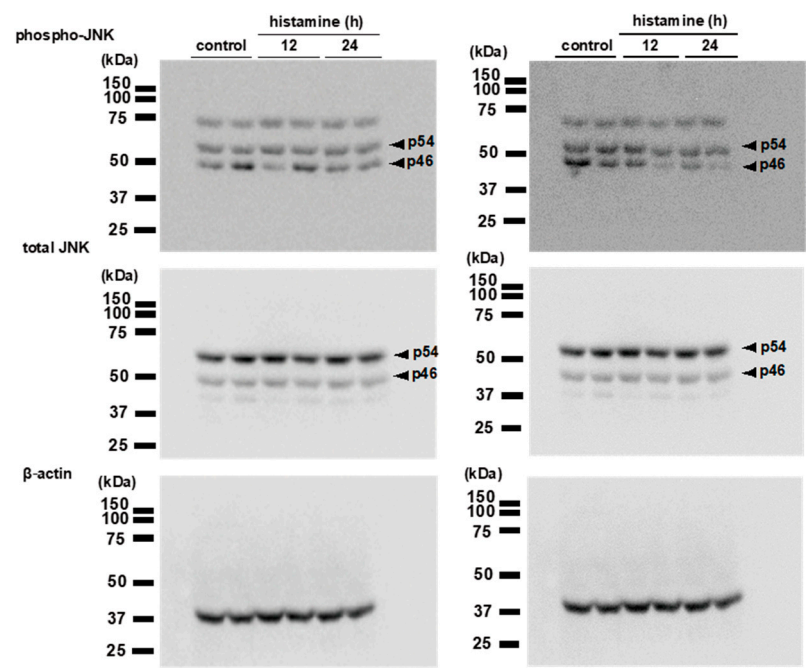

(b) S487TR

Histamine 15-300 sec (n=4)

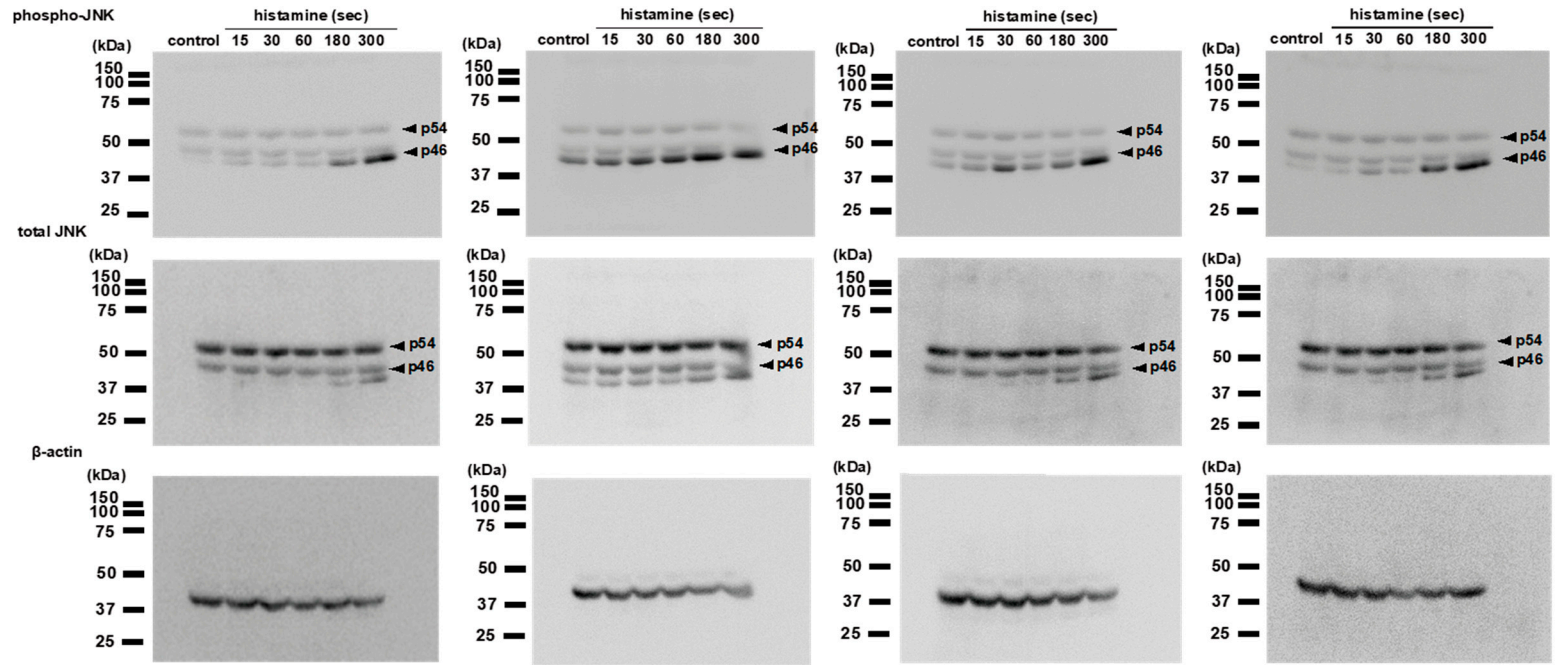

Histamine 10-360 min (n=4)

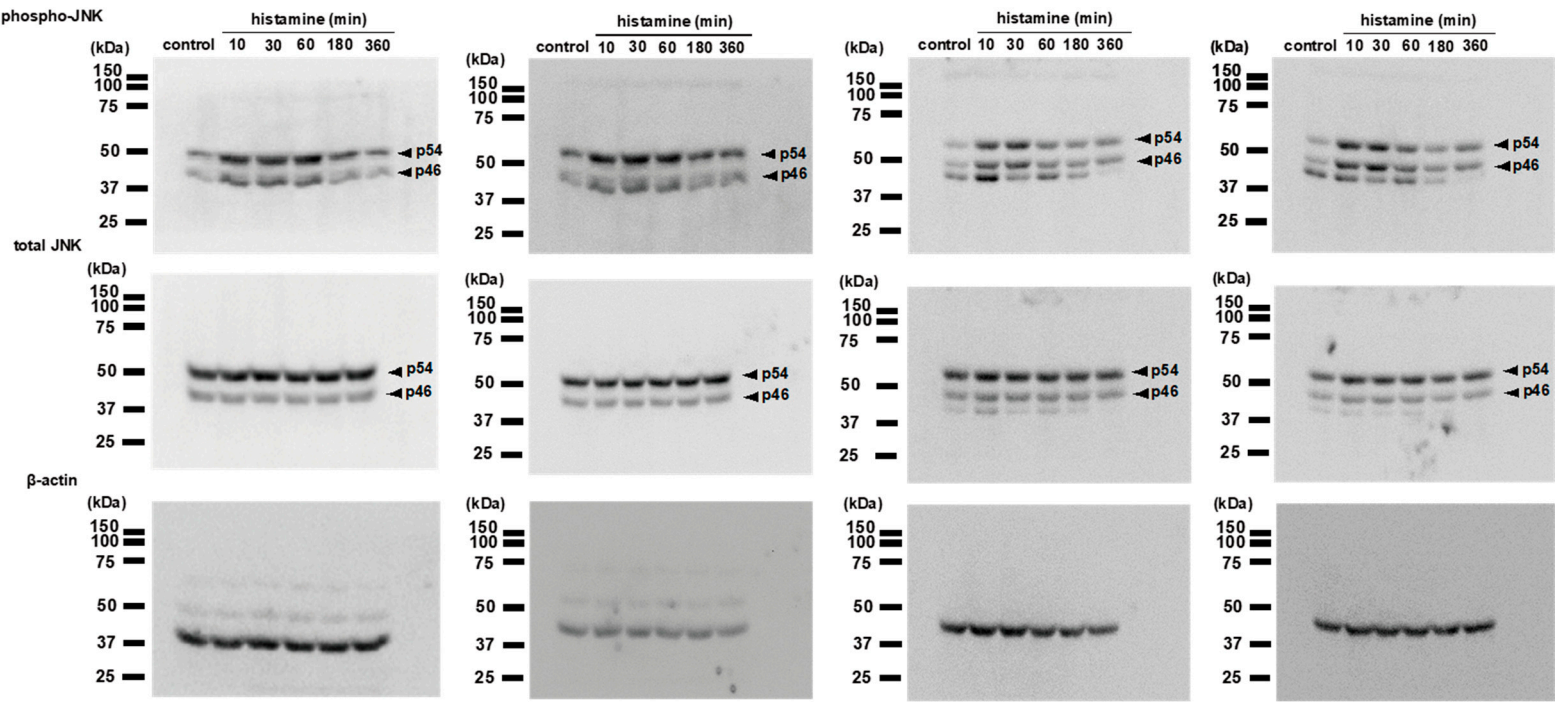

Histamine 12 and 24 h (n=4)

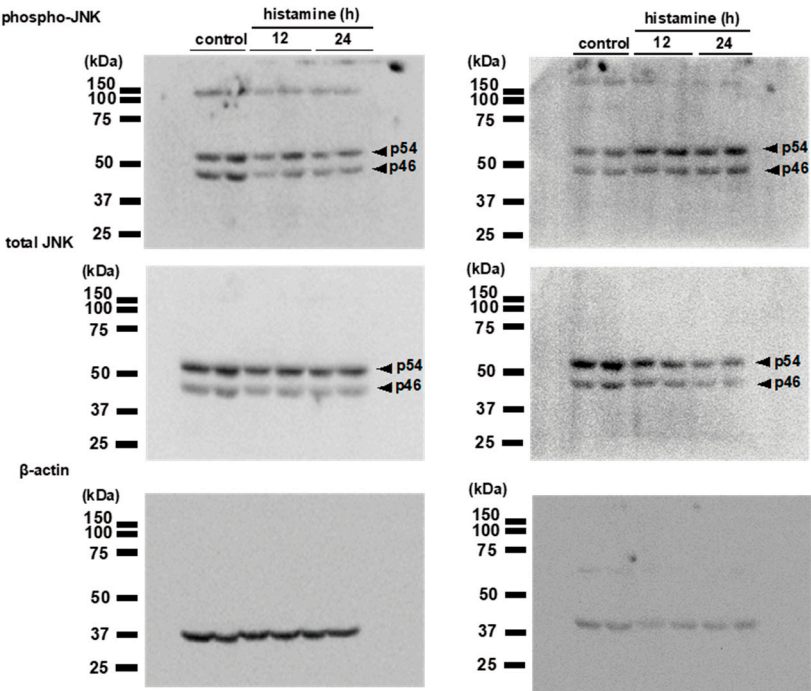



(c) S487A

Histamine 15-300 sec (n=4)

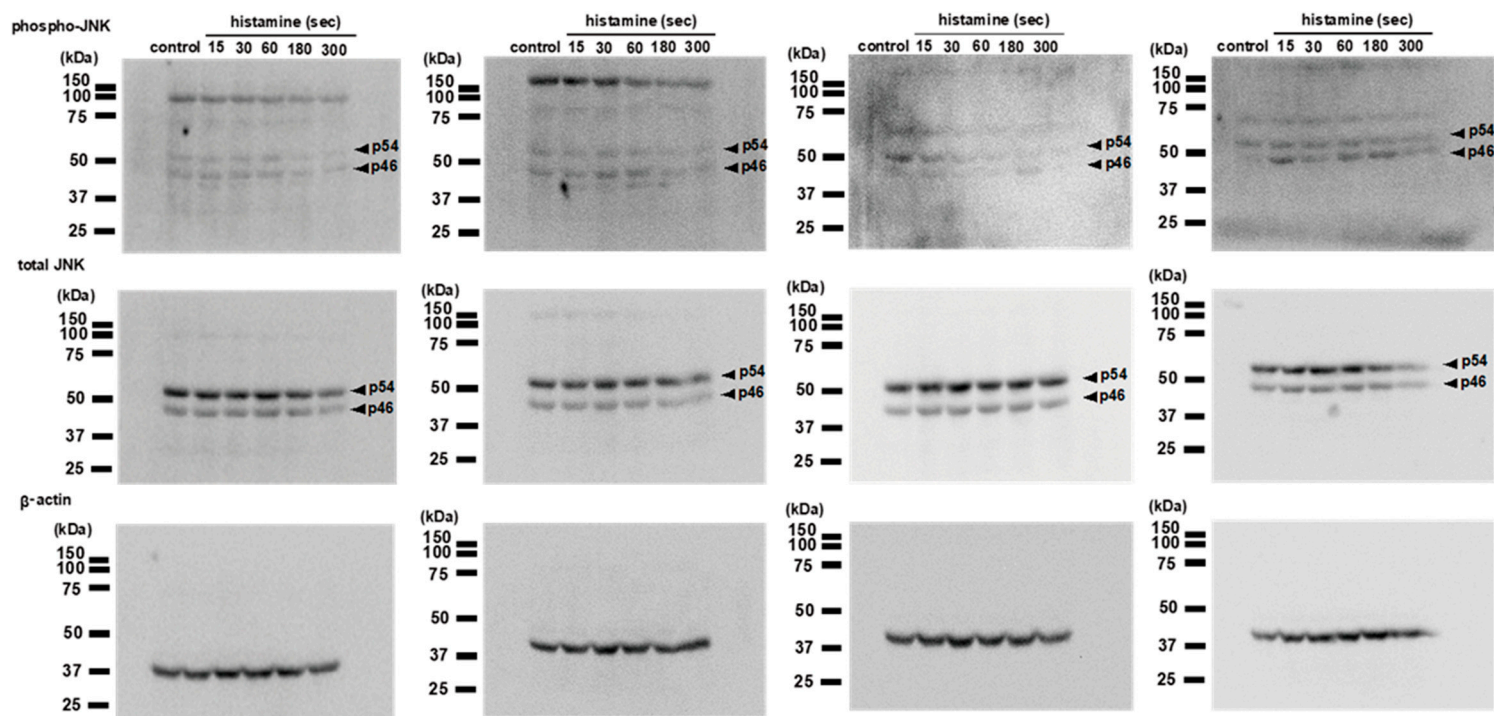

Histamine 10-360 min (n=4)

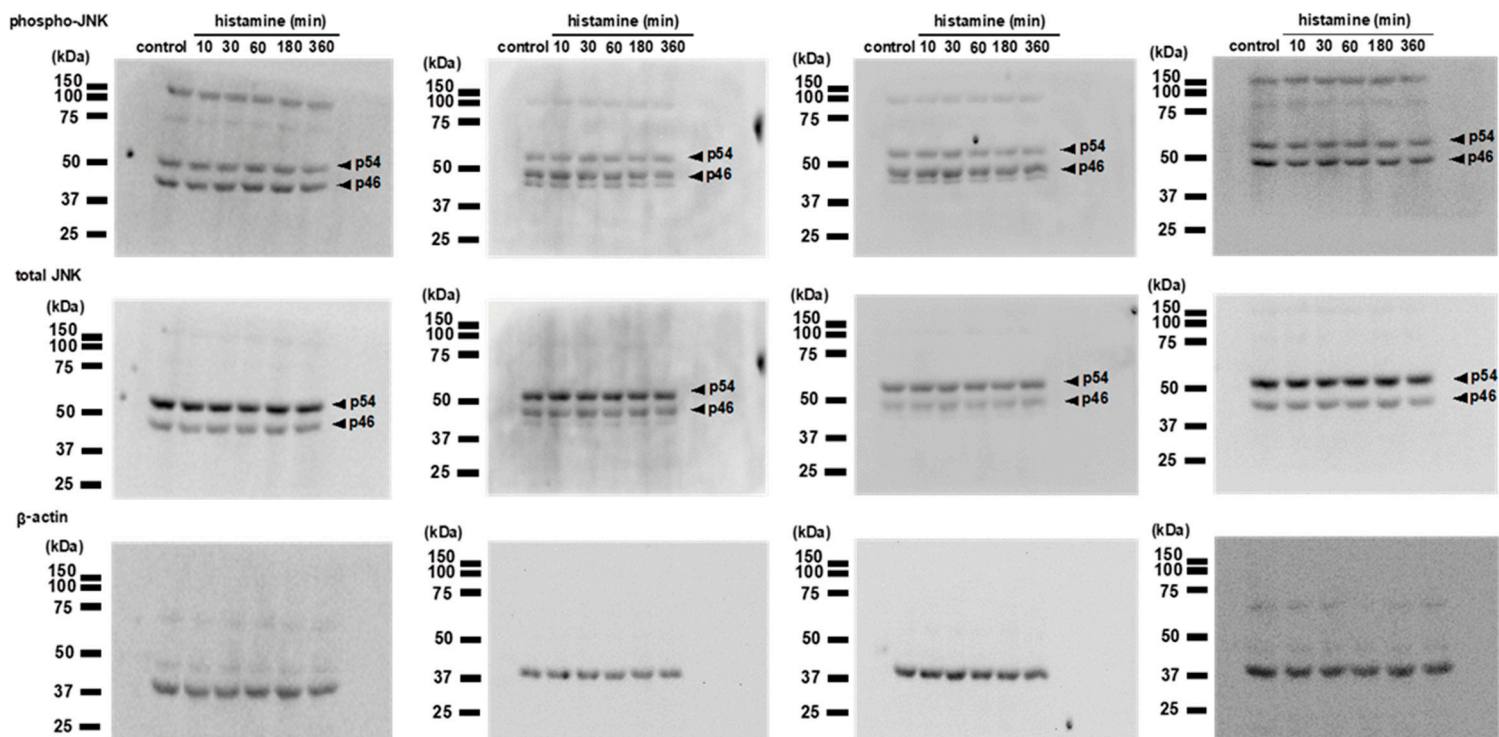

Histamine 12 and 24 h (n=4)

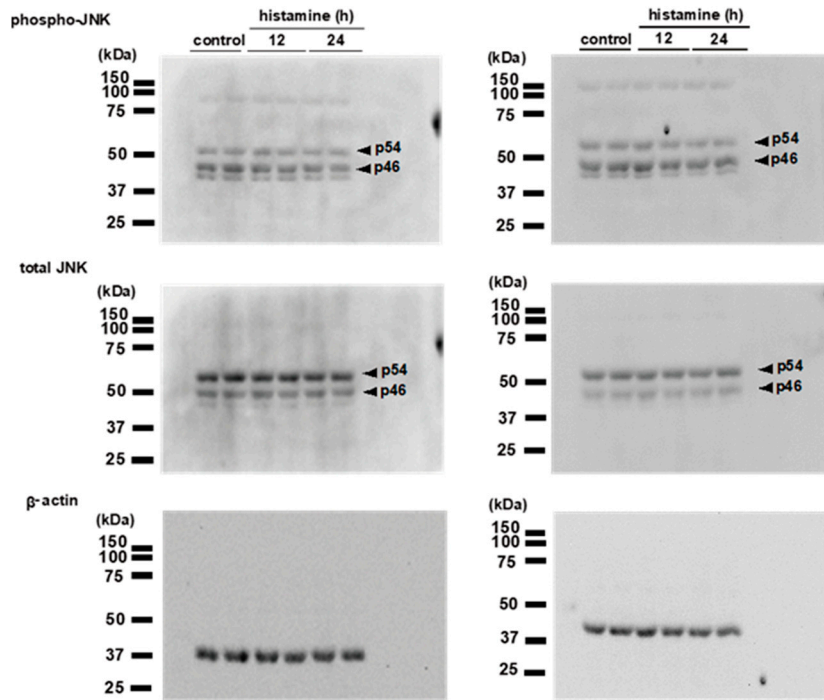

Supplemental Figure S3. Uncropped immunoblot images obtained from experiments to evaluate time courses of histamine-induced JNK phosphorylation. CHO cells expressing WT (a), S487TR (b), and S487A (c) were stimulated with or without (control) 100  $\mu$ M histamine for 15–300 sec , 10–360 min, and 12–24 h and then protein extracts from the cells were subjected to immunoblot analyses. All of uncropped immunoblot images (n=4) of phosphorylated JNK (phospho-JNK), total JNK, and  $\beta$ -actin are shown in (a)–(c).
